# Supplementary material for: A two-pronged anti-leukemic agent based on a hyaluronic acid–green tea catechin conjugate for inducing targeted cell death and terminal differentiation
Source: Royal Society of Chemistry journal article supplement (doi:10.1039/c9bm01146c), 2019-11-13
Supplement: c9bm01146c1.pdf [file c9bm01146c1.pdf]

## Supporting Information

### **A two-pronged anti-leukemic agent based on hyaluronic acid-green tea catechin conjugate for inducing targeted cell death and terminal differentiation**

Kun Liang,<sup>a</sup> Ki Hyun Bae,<sup>a</sup> Akiko Nambu,<sup>b</sup> Bibek Dutta,<sup>b</sup> Joo Eun Chung,<sup>a</sup> Motomi Osato,<sup>a,b,c,d</sup> and Motoichi Kurisawa<sup>a\*</sup>

*<sup>a</sup>Institute of Bioengineering and Nanotechnology, 31 Biopolis Way, The Nanos, Singapore 138669*

*<sup>b</sup>Cancer Science Institute of Singapore, National University of Singapore, 14 Medical Drive, 117599 Singapore.*

*<sup>c</sup>International Research Center for Medical Sciences, Kumamoto University, 2-2-1 Honjo, Chuo-ku, Kumamoto City, 860-0811 Japan.*

*<sup>d</sup>Department of Paediatrics, Yong Loo Lin School of Medicine, National University of Singapore, 1E Kent Ridge Road, NUHS Tower Block, Level 12, 119228 Singapore*

\*Corresponding author. Tel.: +65-6824-7139; fax: +65-6478-9083

*E-mail address:* mkurisawa@ibn.a-star.edu.sg

## Supplementary Table

**Table S1. Mean fluorescence intensity of HEK293, HL60 and NB4 cells treated for 30 min with DyLight 488-labelled HA-EGCG conjugate (500 µg/mL) in comparison to untreated control.**

| Cell Type | Treatment | Mean Fluorescence Intensity |
|-----------|-----------|-----------------------------|
| HEK293    | Control   | 302                         |
|           | HA-EGCG   | 537                         |
| HL60      | Control   | 271                         |
|           | HA-EGCG   | 1123                        |
| NB4       | Control   | 354                         |
|           | HA-EGCG   | 1288                        |

## Supplementary Figures

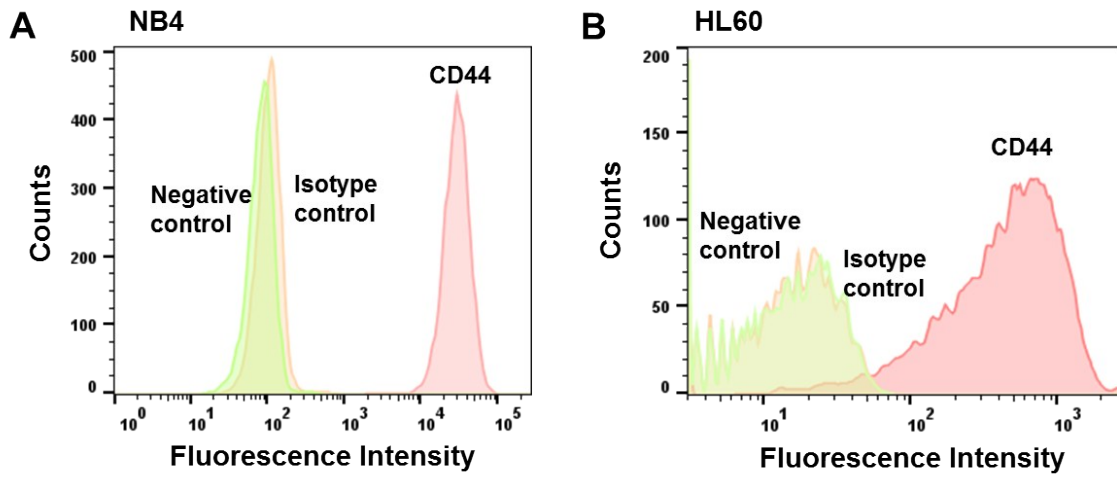

**Fig. S1.** Both AML cell types (A) NB4 and (B) HL60 cells exhibited high levels of CD44 expression.

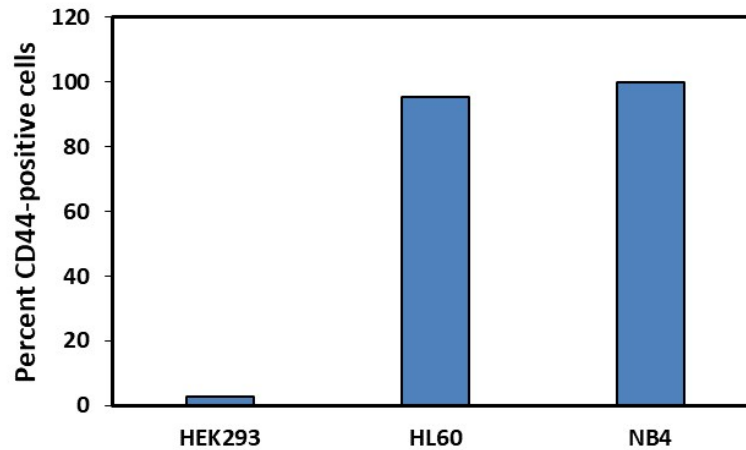

**Fig. S2.** CD44 expression of three different cell lines (HEK293, HL60 and NB4) measured by flow cytometry.

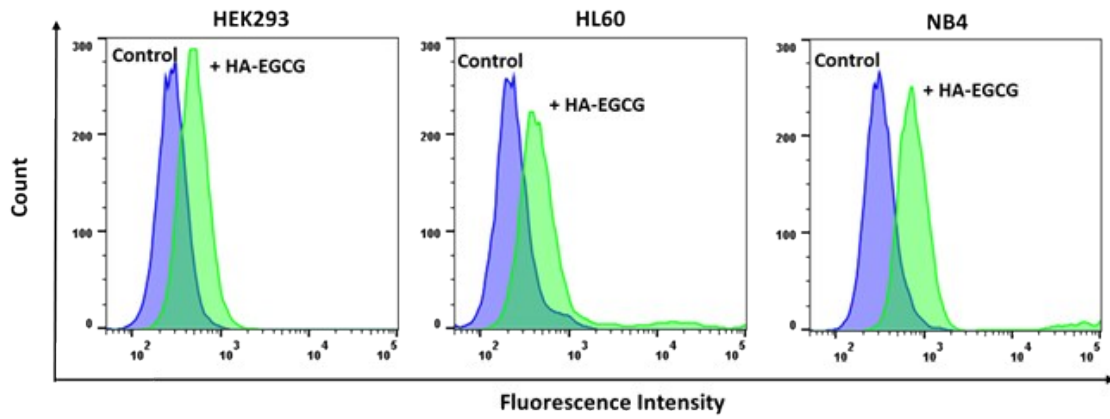

**Fig. S3.** Flow cytometry histograms of HEK293, HL60 and NB4 cells after incubation for 30 min with DyLight 488-labelled HA-EGCG conjugate (500  $\mu\text{g}/\text{mL}$ ).
